# Supplementary material for: Psychosis Prevention: A Modified Clinical High Risk Perspective From the Recognition and Prevention (RAP) Program
Source: Atypon-hosted journal article supplement (doi:10.1176/appi.ajp.2015.13121686), 2015-06-05
Supplement: appi.ajp.2015.13121686.ds001.pdf [file appi.ajp.2015.13121686.ds001.pdf]

## **Bootstrap Resampling**

Bootstrap resampling with replacement was used to internally validate the predictors in the final model (1, 2). Bootstrapping involved randomly sampling the data with replacement (B=10,000 bootstrap samples) for the predictors in the final model and repeating the Cox regression analyses to assess the accuracy of the confidence intervals.

The bootstrap corrected 95% confidence intervals (95% CI) for each of the significant predictors in the final model did not overlap with 0 (Disorganized Communication >2, 95% CI 0.109-2.574, P=0.007; Suspiciousness=5, 95% CI 0.111-2.538, P=0.005; Verbal Memory <2 SD, 95% CI 0.920-3.391, P<0.001; Decline in Social Functioning 95% CI 0.246-0.815, P<.001; Age 95% CI 0.045-0.444, P=.03), suggesting that the final predictor model was not overfit to the data.

## **References**

1. Efron B, Tibshirani RJ: An Introduction to the Bootstrap. CRC press, 1994
2. Sauerbrei W, Schumacher M. A bootstrap resampling procedure for model building: application to the Cox regression model. Stat Med 1992; 11:2093–2109

**TABLE S1. Neurocognitive domains, Individual tests, and Dependent measures**

| <b>Verbal Memory</b> ( $\alpha = .82$ , 4 tests)                                                                                         |                                                                                        |
|------------------------------------------------------------------------------------------------------------------------------------------|----------------------------------------------------------------------------------------|
| California Verbal Learning Test (CVLT)<br>Total for trials 1–5<br>Long delay free recall                                                 | Words recalled in trials 1-5<br>Recognition errors                                     |
| Wechsler Memory Scale, Revised (WMS-R)<br>Logical Memory: Immediate and Delayed                                                          | Story elements recalled                                                                |
| <b>Working Memory</b> ( $\alpha = .78$ , 3 tests)                                                                                        |                                                                                        |
| Wechsler Intelligence Scale for Children-III/Wechsler<br>Adult Intelligence Scale-R (WISC-III/WAIS-R)<br>Digit Span Forward and Backward | Digit sequences recalled                                                               |
| Letter-Number Span                                                                                                                       | Number of correct trials                                                               |
| <b>Executive Function</b> ( $\alpha = .78$ , 5 tests)                                                                                    |                                                                                        |
| Ruff Figural Fluency Test                                                                                                                | Number of correctly reproduced<br>figures                                              |
| Wisconsin Card Sorting Test (WSCT), Version 2<br>Perseverative Errors<br>Categories Completed                                            | Percentage of perseverative errors;<br>Number of correctly completed<br>categories     |
| Conceptual Level Responses                                                                                                               | Number of consecutive correct<br>responses in $\geq 3$ runs                            |
| Controlled Oral Word Association Test (COWAT)                                                                                            | Words produced in 1 minute                                                             |
| <b>Sustained Attention</b> ( $\alpha = .84$ , 3 tests)                                                                                   |                                                                                        |
| Continuous Performance Test-Identical Pairs (CPT-IP)<br>2-, 3-, and 4-digits                                                             | $d'$ (for all stimulus sets)                                                           |
| <b>Processing Speed</b> ( $\alpha = .81$ , 4 tests)                                                                                      |                                                                                        |
| Trails Making Test, Part A and B<br>WISC-III/WAIS-R Digit Symbol Coding                                                                  | Time to complete trails<br>Symbols accurately coded in 2<br>minutes                    |
| Symbol cancellation test                                                                                                                 | Time to complete cancellation                                                          |
| <b>Motor Speed</b> ( $\alpha = .75$ , 4 tests)                                                                                           |                                                                                        |
| Finger Tapping Test, Dominant and Nondominant hand<br>scores                                                                             | Taps in 10 seconds, over 5 blocks                                                      |
| Grooved Pegboard Test, Dominant and Nondominant<br>hand scores                                                                           | Time to place pegs                                                                     |
| <b>Visuo-Spatial Processing</b> ( $\alpha = .63$ , 2 tests)                                                                              |                                                                                        |
| Judgment of Line Orientation<br>WAIS-R/WISC-III Block Design                                                                             | Lines accurately matched<br>Correctly reconstruct blocks to<br>match patterns on cards |
| <b>Language</b> ( $\alpha = .82$ , 3 tests)                                                                                              |                                                                                        |
| Wide Range Achievement Test-III (WRAT-III) Reading                                                                                       | Total score for words read<br>correctly                                                |
| Boston Naming Test<br>WAIS-R/WISC-III Vocabulary                                                                                         | Number of correctly named items<br>Number of words orally defined                      |

**TABLE S2. Potential Predictor Domains and Individual Variables for the Multivariable Logistic Regression Models**

| <b>Domain</b>                     | <b>Variables</b>                                                                                                                                                                                                                                                                                  |
|-----------------------------------|---------------------------------------------------------------------------------------------------------------------------------------------------------------------------------------------------------------------------------------------------------------------------------------------------|
| <b>Demographics</b>               | Age at baseline<br>Level of education<br>Parental socio-economic status (SES)<br>Gender<br>Handedness<br>Race<br>Ethnicity<br>First-degree relative with Psychosis                                                                                                                                |
| <b>Intellectual Functioning</b>   | Estimated Current IQ                                                                                                                                                                                                                                                                              |
| <b>Neurocognitive Performance</b> | Processing speed<br>Verbal memory<br>Executive function<br>Working memory<br>Visuo-spatial processing<br>Motor speed<br>Sustained attention<br>Language                                                                                                                                           |
| <b>Positive Symptoms, SOPS</b>    | 5 Symptoms:<br>1. Unusual Thought Content<br>2. Suspiciousness<br>3. Grandiosity<br>4. Perceptual Abnormalities<br>5. Disorganized Communication<br>Absolute number of symptoms greater than 2, level 3, and level 4<br>Total Positive Score (raw score; cutoff > 15)                             |
| <b>Negative Symptoms, SOPS</b>    | 4 Symptoms:<br>1. Social Isolation<br>2. Avolition<br>3. Expression of Emotion<br>4. Experience of Emotion and Self<br>5. Ideational Richness<br>6. Occupational Functioning<br>Absolute number of symptoms greater than 2, level 3, and level 4<br>Total Negative Score (raw score; cutoff > 13) |

*Continued*

|                                       |                                                                                                                                                                                                                                                                                                                                                                                                               |
|---------------------------------------|---------------------------------------------------------------------------------------------------------------------------------------------------------------------------------------------------------------------------------------------------------------------------------------------------------------------------------------------------------------------------------------------------------------|
| <b>Disorganized Symptoms, SOPS</b>    | 4 Symptoms: <ol style="list-style-type: none"> <li>1. Odd Behavior or Appearance</li> <li>2. Bizarre Thinking</li> <li>3. Trouble with Focus and Attention</li> <li>4. Hygiene Social Attentiveness</li> </ol> Absolute number of symptoms greater than 2, level 3, and level 4<br>Total Disorganized Score (raw score; cutoff > 4)                                                                           |
| <b>General Symptoms, SOPS</b>         | 4 Symptoms: <ol style="list-style-type: none"> <li>1. Sleep Disturbances</li> <li>2. Dysphoric Mood</li> <li>3. Motor Disturbances</li> <li>4. Impaired Tolerance to Normal Stress</li> </ol> Absolute number of symptoms greater than 2, level 3, and level 4<br>Total General Score (raw score; cutoff > 6)                                                                                                 |
| <b>Total score, SOPS</b>              | Raw score; cutoff > 41<br>Absolute number of symptoms greater than 2, level 3, and level 4                                                                                                                                                                                                                                                                                                                    |
| <b>Social and Role Functioning</b>    | Baseline GF: Social<br>Baseline GF: Role<br>GF: Social or Role deterioration of 10%<br>GF: Social or Role deterioration of 30%<br>Global Assessment of Functioning (GAF)                                                                                                                                                                                                                                      |
| <b>Diagnostic Comorbidity: Axis 1</b> | DSM-IV diagnoses: <ul style="list-style-type: none"> <li>Any mood disorder</li> <li>Any anxiety disorder</li> <li>Any mood or anxiety</li> <li>Any substance abuse disorder</li> <li>Major depressive disorder</li> <li>Generalized anxiety</li> <li>Agoraphobia</li> <li>Obsessive-compulsive disorder</li> <li>Panic</li> <li>Social phobia</li> <li>Cannabis</li> <li>Alcohol</li> <li>Nicotine</li> </ul> |
| <b>Diagnostic Comorbidity: Axis 2</b> | DSM-IV diagnoses: <ul style="list-style-type: none"> <li>Paranoid</li> <li>Schizoid</li> <li>Schizotypal</li> </ul>                                                                                                                                                                                                                                                                                           |
